# Supplementary material
Source: MDPI journal article supplement (https://www.mdpi.com/2039-4403/10/1/3)
Supplement: s1 [file s1]

## **Appendix 2: MEDLINE Search strategy:**

1. Patient Care Team/ or intersectoral collaboration/ or interprofessional relations/ or interdisciplinary communication/ or Physician-Nurse Relations/
2. ((Interprofessional or "Inter professional" or Intersectoral or interdisciplinary or "inter disciplinary") adj3 (collaborat\* or co-operat\* or cooperat\* or communicat\* or interact\* or relation\* or discussion\* or round\* or meeting or teamwork or care)).ti,ab.
3. ((Multiprofessional or "multi professional" or multidisciplinary or "multi disciplinary") adj3 (collaborat\* or co-operat\* or cooperat\* or communicat\* or interact\* or relation\* or discussion\* or round\* or meeting or teamwork or care)).ti,ab.
4. ((crossdisciplinary or "cross disciplinary") adj3 (collaborat\* or co-operat\* or cooperat\* or communicat\* or interact\* or relation\* or discussion\* or round\* or meeting or teamwork or care)).ti,ab.
5. ((transdisciplinary or "trans disciplinary") adj3 (collaborat\* or co-operat\* or cooperat\* or communicat\* or interact\* or relation\* or discussion\* or round\* or meeting or teamwork or care)).ti,ab.
6. ((Interoccupation\* or "inter occupation" or "inter occupational") adj3 (collaborat\* or co-operat\* or cooperat\* or communicat\* or interact\* or relation\* or discussion\* or round\* or meeting or teamwork or care)).ti,ab.
7. (("doctor nurse" or "physician nurse") adj3 (collaborat\* or co-operat\* or cooperat\* or communicat\* or interact\* or relation\* or discussion\* or round\* or meeting or teamwork or care)).ti,ab.
8. 1 or 2 or 3 or 4 or 5 or 6 or 7
9. Mortality/ or death/ or hospital mortality/
10. (death\* or mortalit\* or fatalit\*).ti,ab.
11. 9 or 10
12. 8 and 11
